# Supplementary material for: An ultra-sensitive electrochemical sensor for the detection of acetaminophen in the presence of etilefrine using bimetallic Pd–Ag/reduced graphene oxide nanocomposites
Source: Royal Society of Chemistry journal article supplement (doi:10.1039/c7nj04775d), 2018-01-01
Supplement: c7nj04775d1.pdf [file c7nj04775d1.pdf]

**Ultra-sensitive electrochemical sensor for the detection of acetaminophen in the presence of etilefrine using bimetallic Pd-Ag/reduced graphene oxide nanocomposites**

Y. Veera Manohara Reddy<sup>#</sup>, Bathinapatla Sravani<sup>2</sup>, T. Łuczak<sup>†</sup>, M. Osińska,<sup>□</sup> Hussen Maseed<sup>□</sup>,  
P. Ragavendra<sup>2</sup>, L. Subramanyam Sarma<sup>2</sup>, V. V. S. Srikanth<sup>□</sup>, G. Madhavi<sup>\*#</sup>

<sup>#</sup>Electrochemical Research Laboratory, Department of Chemistry, Sri Venkateswara University,  
Tirupati, India

<sup>2</sup>Nanoelectrochemistry Laboratory, Department of Chemistry, Yogi Vemana University, Kadapa,  
India

<sup>†</sup> Department of Chemistry, Adam Mickiewicz University in Poznań, Umultowska 89b, 61-614  
Poznań, Poland

<sup>□</sup>Poznan University of Technology, Institute of Chemistry and Technical Electrochemistry  
Berdychowo 4, 60-965, Poznań, Poland

<sup>□</sup>School of Engineering Sciences and Technology, University of Hyderabad, Hyderabad, India

\*Corresponding Authors E-mail:- [gmchem01@gmail.com](mailto:gmchem01@gmail.com), contact: 9440096500

## ESI 1

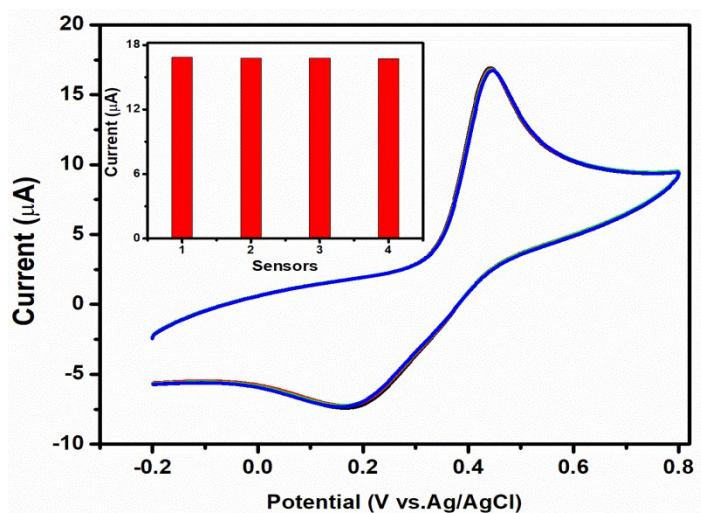

**Figure S1** CV responses of four Pd-Ag/rGO/GCE electrodes prepared in the same conditions for detection of 0.025 M APAP in PBS solution (pH 7.0). Inset: calibrated histograms of reproducibility test.

## ESI 2

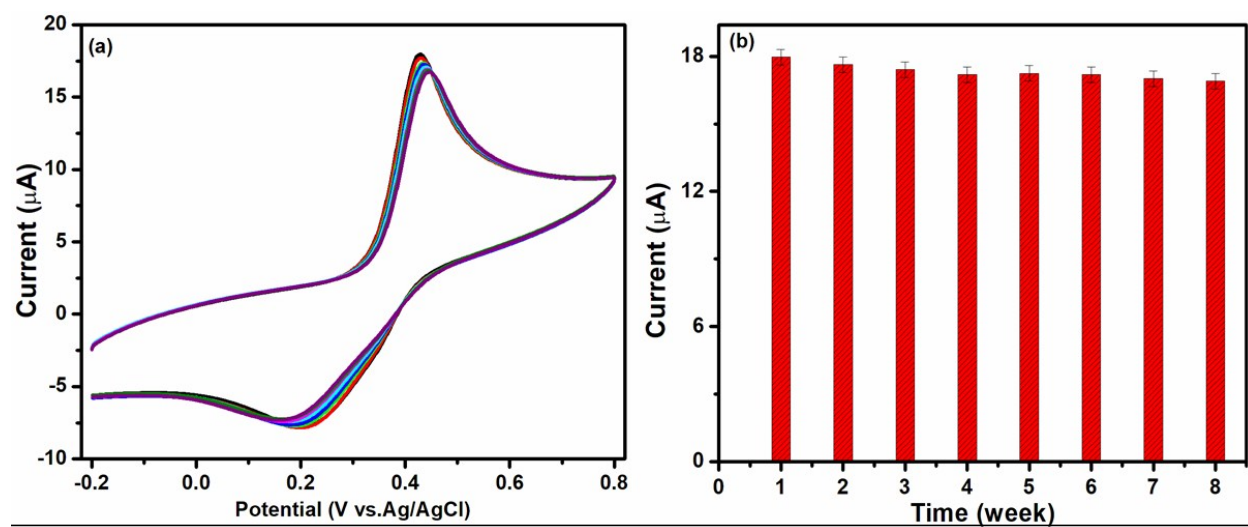

**Figure S2(a)** CV response of four Pd-Ag/rGO/GCE electrodes for detection of 0.025 M APAP in PBS solution (pH 7.0) for eight weeks, (b) Inset: calibrated histograms of stability test.

ESI 3

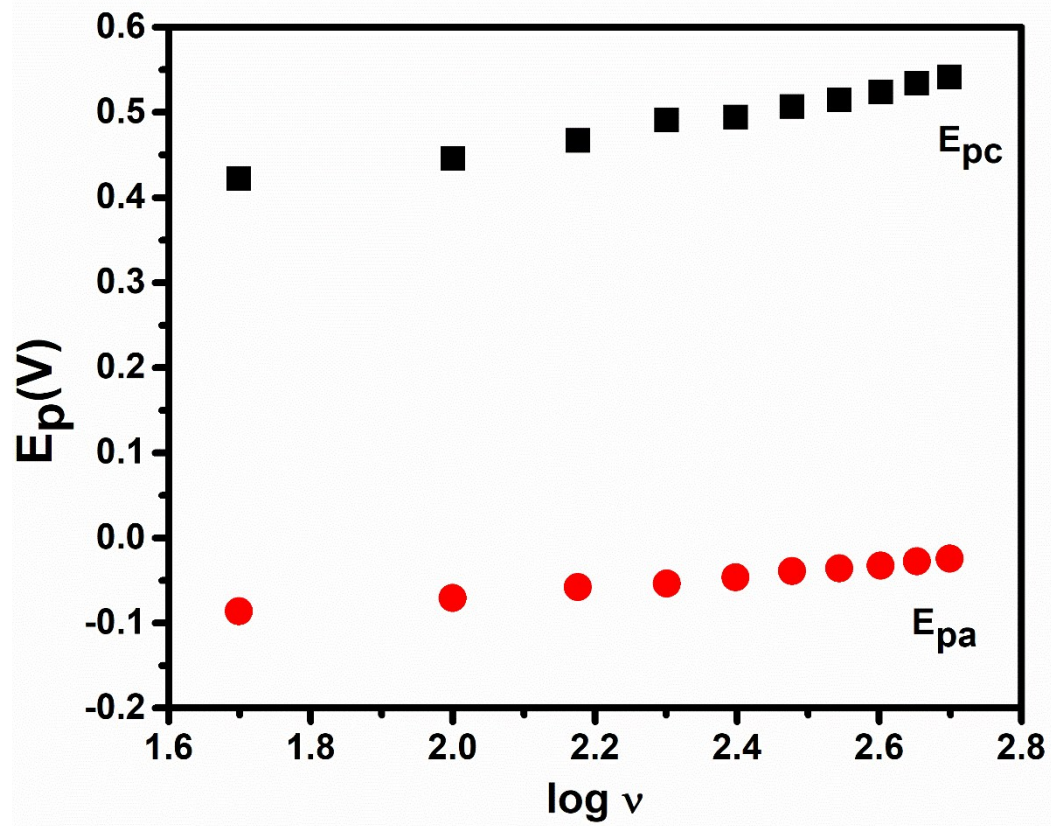

Figure S3. Plot of peak potential ( $E_p$ ) vs  $\log \nu$

**Table ESI 1. Comparison of APAP sensing at different modified electrodes.**

| Electrochemical sensor                                   | Method       | LOD [ $\mu\text{M}$ ] | LDR [ $\mu\text{M}$ ] | Ref. |
|----------------------------------------------------------|--------------|-----------------------|-----------------------|------|
| TiO-GR/GCE <sup>a</sup>                                  | CV           | 0.21                  | 1–100                 | [52] |
| PMR-TiO <sub>2</sub> -GR/GCE <sup>b</sup>                | CV, DPV      | 0.025                 | 0.25–50               | [53] |
| Pd-GO/GCE <sup>c</sup>                                   | EIS, CV, DPV | 0.0022                | 0.005–80              | [54] |
| Ni <sub>2</sub> O <sub>3</sub> -NiO-GR/GCE <sup>d</sup>  | CV, DPV      | 0.02                  | 0.04–100              | [55] |
| CoFe <sub>2</sub> O <sub>4</sub> -GO/CPE <sup>e</sup>    | SWV          | 0.025                 | 0.03–12               | [56] |
| NiFe <sub>2</sub> O <sub>4</sub> -GR/CPE <sup>f</sup>    | SWV          | 0.003                 | 0.01–9                | [57] |
| Fe <sub>3</sub> O <sub>4</sub> -PDDA-GO/GCE <sup>g</sup> | DPV          | 0.037                 | 0.1–100               | [58] |
| GR-CS/GCE <sup>h</sup>                                   | CV, DPV, CC  | 0.3                   | 1–100                 | [59] |
| GR-PANI/GCE <sup>i</sup>                                 | CV           | -                     | 10–100                | [60] |
| PEDOT-GO/GCE <sup>j</sup>                                | CV           | 0.57                  | -                     | [61] |
| 4-ABA-ERGO/GCEs <sup>k</sup>                             | DPV          | 0.01                  | 0.1–65                | [62] |
| SWCNT/CCE <sup>l</sup>                                   | DPV          | 0.05                  | 0.08–200              | [63] |
| MWCNT-PDDA-PSS/GE <sup>m</sup>                           | CA           | 0.5                   | 25–400                | [64] |
| N-DHPB/MWCNT/CPE <sup>n</sup>                            | DPV          | 10                    | 15–270                | [65] |
| PtNP-MWCNT/CPE <sup>o</sup>                              | DPV          | 0.17                  | 0.4–60                | [66] |
| EF-NiO/MWCNT/CPE <sup>p</sup>                            | SWV          | 0.5                   | 0.8–600               | [67] |
| MWCNTs-GNS/GCE <sup>q</sup>                              | DPV          | 0.1                   | 0.8–110               | [68] |
| MWCNT/BPPGE <sup>r</sup>                                 | AdsSV        | 0.01                  | 0.01–2/2–20           | [69] |
| Chitosan/MWCNT/GCE <sup>s</sup>                          | DPV          | 0.17                  | 1–145/4–200           | [70] |
| Au/NPs-Au <sup>t</sup>                                   | DPV          | 0.018                 | 0.0001 mM to 2 mM     | [16] |

<sup>a</sup>TiO-GR/GCE=TiO<sub>2</sub> nanoparticles with graphene modified GCE. <sup>b</sup>PMR/TiO<sub>2</sub>-GR/GCE = TiO<sub>2</sub>-graphene/poly(methyl red) modified GCE. <sup>c</sup>Pd-GO/GCE = Pd nanoparticles-graphene modified GCE. <sup>d</sup>Ni<sub>2</sub>O<sub>3</sub>-NiO GR/GCE = electrochemically reduced graphene loaded with Ni oxides nanoparticles modified GCE. <sup>e</sup>CoFe<sub>2</sub>O<sub>4</sub>-GO/CPE = graphene and CoFe<sub>2</sub>O<sub>4</sub> nanoparticles modified carbon paste

electrode, <sup>f</sup>NiFe<sub>2</sub>O<sub>4</sub>-GR/CPE = NiFe<sub>2</sub>O<sub>4</sub> nanoparticles and graphene modified carbon paste electrode. <sup>g</sup>Fe<sub>3</sub>O<sub>4</sub>-PDDA-GO/GCE = Fe<sub>3</sub>O<sub>4</sub>nanoparticles-poly(diallyldimethylammonium chloride)-graphene oxide nanocomposite modified GCE. <sup>h</sup>GR-CS/GCE = nanocomposites of graphene-chitosan modified GCE. <sup>i</sup>GR-PANI/GCE = graphene-polyaniline nanocomposite modified GCE. <sup>j</sup>PEDOT-GO/GCE = poly(3,4-ethylenedioxythiophene)/graphene oxide composite modified GCE. <sup>k</sup>4-ABA-ERGO/GCEs = poly(4-aminobenzoic acid)/electrochemically reduced graphene oxide modified GCE. <sup>l</sup>SWCNT/CCE = Single-wall carbon nanotubes modified carbon ceramic electrode. <sup>m</sup>MWCNT-PDDA-PSS/GE = MWCNT on poly(diallyldimethylammonium chloride)/poly styrene sulfonate modified graphite electrode. <sup>n</sup>N-DHPB/MWCNT/CPE = N-(3,4-dihydroxyphenethyl)-3,5-dinitrobenzamide-MWCNT modified carbon paste electrode. <sup>o</sup>PtNP-MWCNT/CPE = Pt nanoparticles – MWCNT modified CPE. <sup>p</sup>EF-NiO/MWCNT/CPE = ethynylferrocene and NiO – MWCNT modified CPE. <sup>q</sup>MWCNTs-GNS/GCE = MWCNT-graphene nanosheets nanocomposite modified GCE. <sup>r</sup>MWCNT/BPPGE = MWCNT/basal plane pyrolytic graphite electrode. <sup>s</sup>Chitosan/MWCNT/GCE = Chitosan and MWCNT modified GCE. <sup>t</sup>Au/NPs-Au = Au with SAM layers composed with functionalized S-containing compounds and gold nanoparticles.
